# Supplementary material for: A high-performance bimetallic cobalt iron oxide catalyst for the oxygen evolution reaction
Source: Royal Society of Chemistry journal article supplement (doi:10.1039/d0ce00401d), 2020-01-01
Supplement: d0ce00401d1.pdf [file d0ce00401d1.pdf]

## Supporting information

### High-performance bimetallic cobalt iron oxide catalyst for oxygen evolution reaction

**Donggang Guo <sup>a</sup>, Hongzhi Kang <sup>a</sup>, Pengkun Wei <sup>b</sup>, Yang Yang <sup>b</sup>, Zewei Hao <sup>b</sup>,  
Quanxi Zhang <sup>\*a</sup> Lu Liu <sup>b</sup>**

<sup>a</sup>College of Environment and Resource, Shanxi University, Taiyuan, 030006, China

<sup>b</sup>Tianjin Key Laboratory of Environmental Remediation and Pollution Control,  
College of Environmental Science and Engineering, Nankai University, Tianjin,  
300350, China.

\* Corresponding authors: Quanxi Zhang (E-mail: [qxzhang@sxu.edu.cn](mailto:qxzhang@sxu.edu.cn))

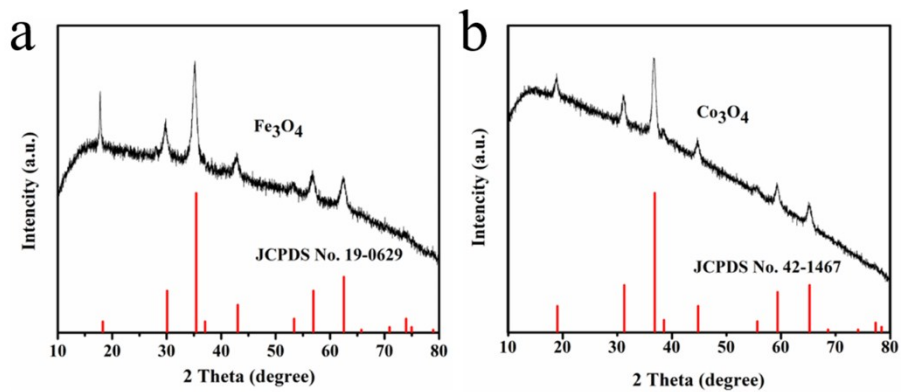

**Fig. S1.** XRD patterns of the responding  $\text{Fe}_3\text{O}_4$  and  $\text{Co}_3\text{O}_4$ .

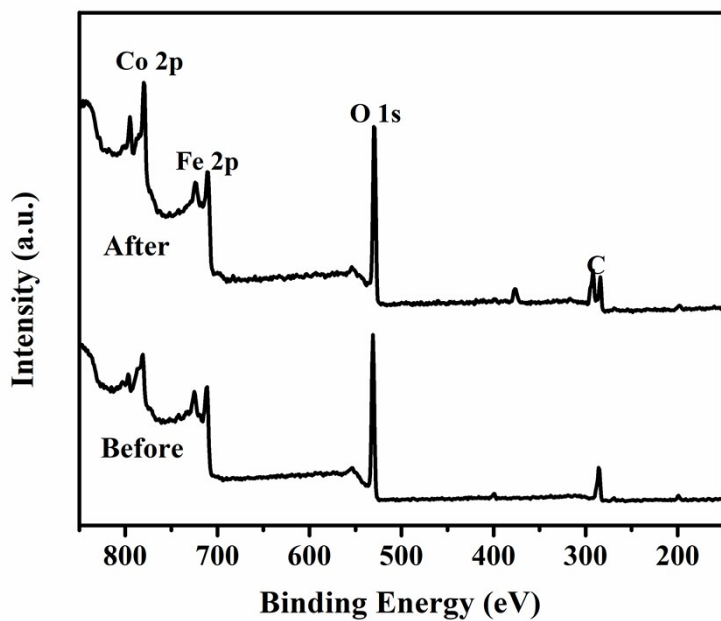

**Fig. S2.** XPS survey spectra of  $\text{CoFe}_2\text{O}_4$  before and after stability test.

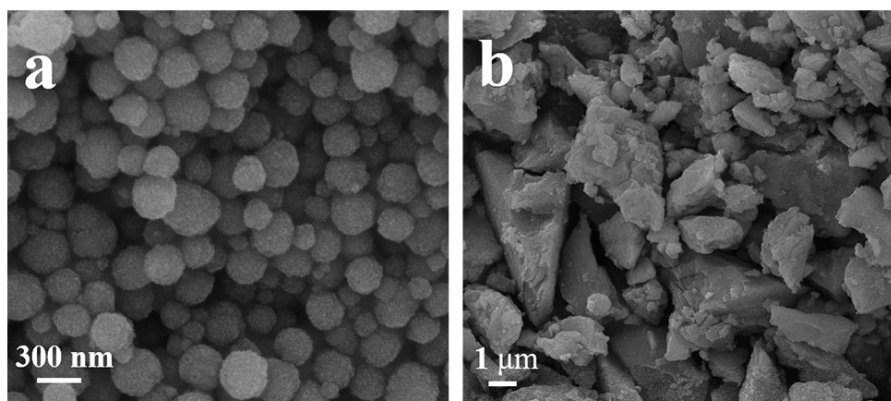

**Fig. S3.** SEM images of the as-prepared  $\text{Fe}_3\text{O}_4$  and  $\text{Co}_3\text{O}_4$ .

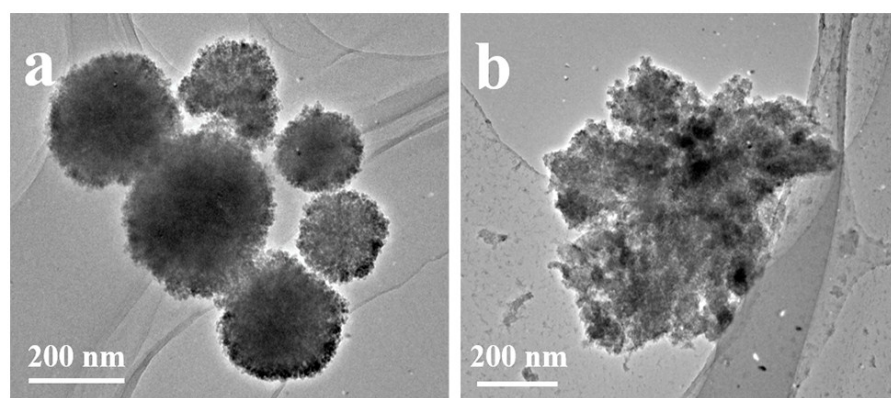

**Fig. S4.** TEM images of the as-prepared  $\text{Fe}_3\text{O}_4$  and  $\text{Co}_3\text{O}_4$ .

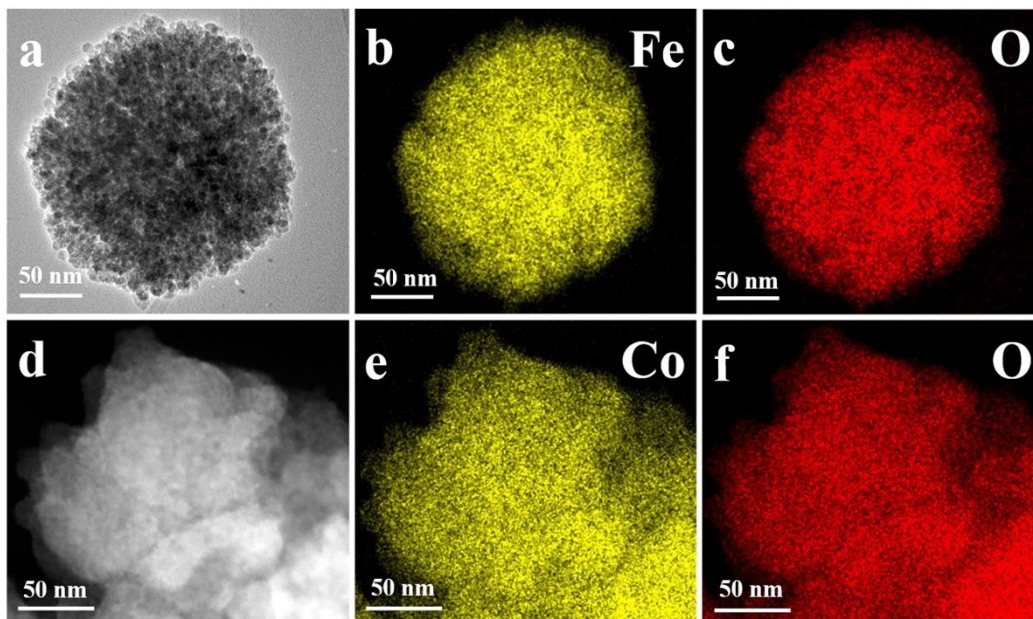

**Fig. S5.** The elemental mappings of the as-prepared  $\text{Fe}_3\text{O}_4$  and  $\text{Co}_3\text{O}_4$ .

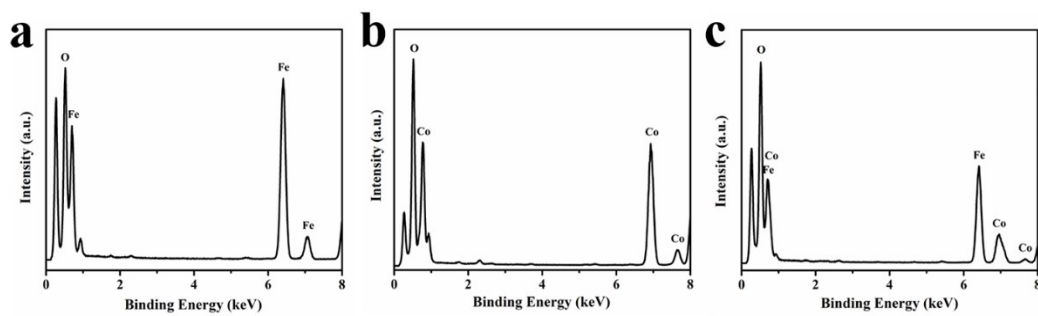

**Fig. S6.** EDX patterns of the as-prepared  $\text{Fe}_3\text{O}_4$ ,  $\text{Co}_3\text{O}_4$  and  $\text{CoFe}_2\text{O}_4$ .

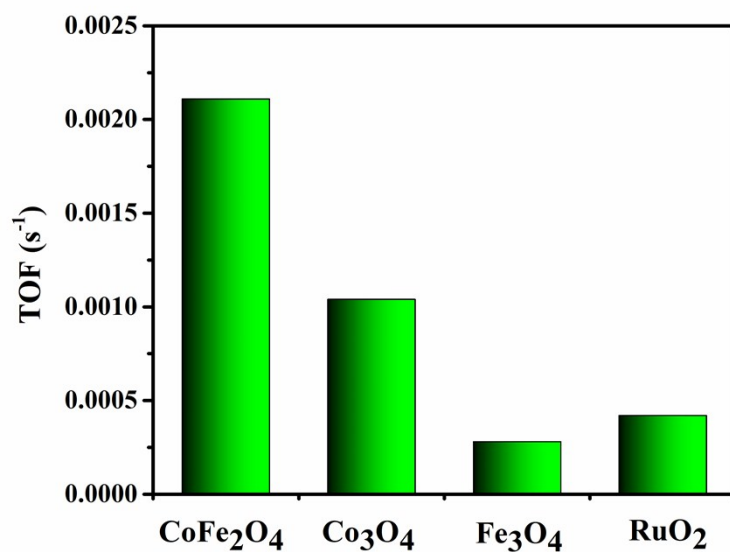

**Fig. S7.** The TOF values of CoFe<sub>2</sub>O<sub>4</sub>, Co<sub>3</sub>O<sub>4</sub>, Fe<sub>3</sub>O<sub>4</sub>, and RuO<sub>2</sub> at the overpotential of 275 mV.

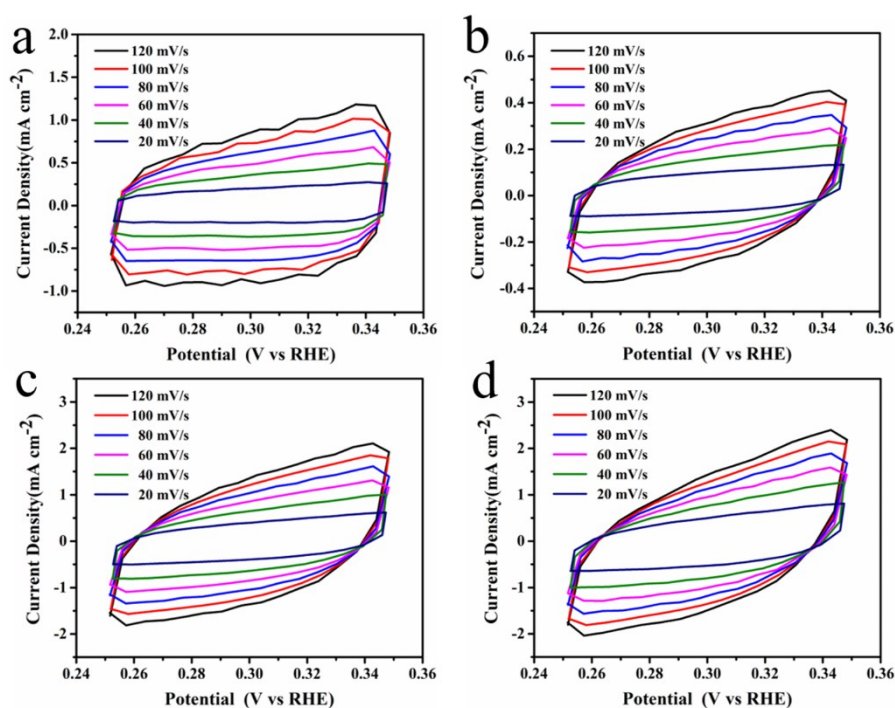

**Fig. S8.** Cyclic voltammety curves with the slew rates of 120, 100, 80, 60, 40 and 20 mV/s of CoFe<sub>2</sub>O<sub>4</sub>, Co<sub>3</sub>O<sub>4</sub>, Fe<sub>3</sub>O<sub>4</sub> and RuO<sub>2</sub>.

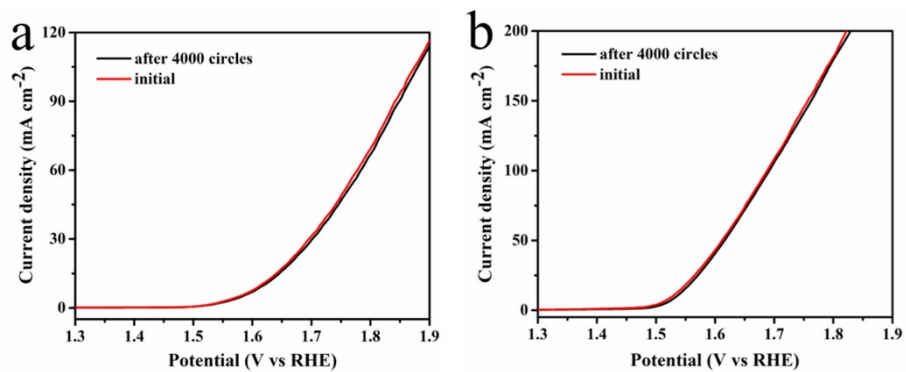

**Fig. S9.** Polarization curves of (a) Fe<sub>3</sub>O<sub>4</sub> and (b) Co<sub>3</sub>O<sub>4</sub> after 4000 circles stability in 1 M KOH.

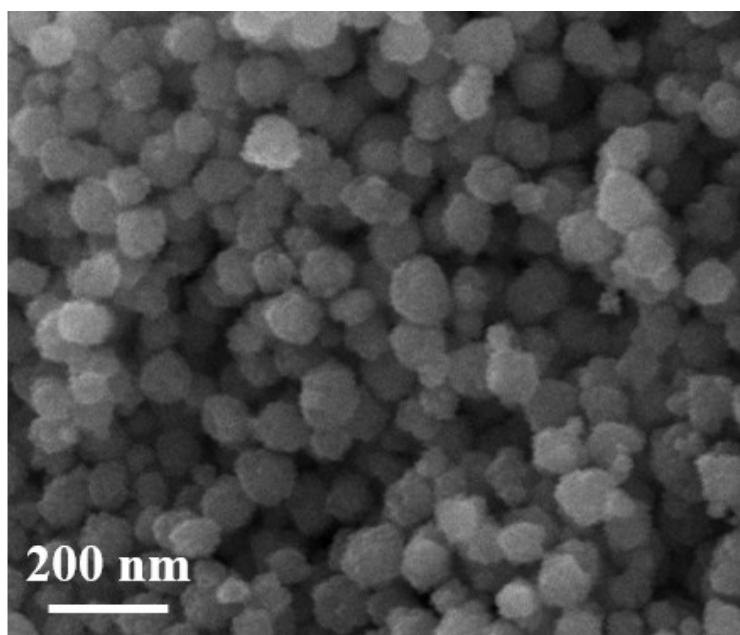

**Fig. S10.** SEM image of CoFe<sub>2</sub>O<sub>4</sub> after stability test.

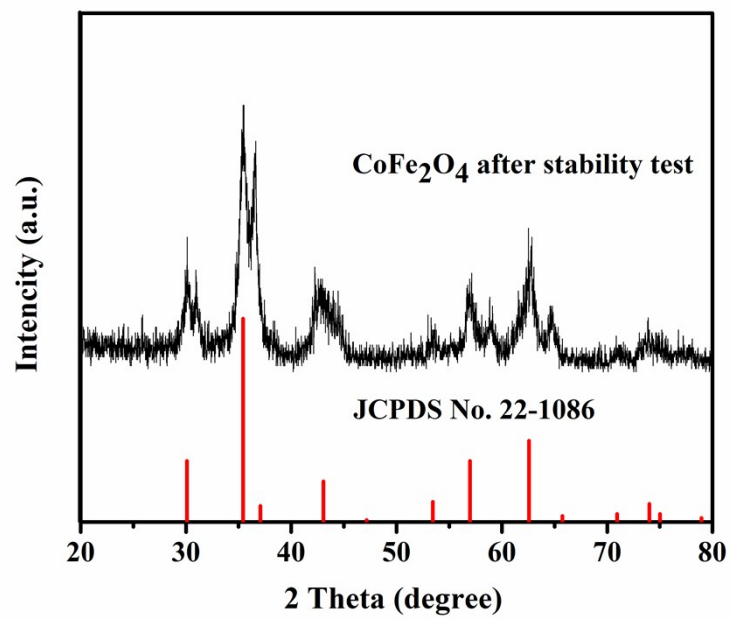

**Fig. S11.** XRD pattern of CoFe<sub>2</sub>O<sub>4</sub> after stability measurement.
